# Supplementary material for: Bifunctional heterogeneous catalysts derived from the coordination of adenosine monophosphate to Sn(iv) for effective conversion of sucrose to 5-hydroxymethylfurfural
Source: Royal Society of Chemistry journal article supplement (doi:10.1039/d1cy01789f), 2021-11-18
Supplement: d1cy01789f1.pdf [file d1cy01789f1.pdf]

Electronic Supplementary Information (ESI)

**Bifunctional heterogeneous catalysts derived from the coordination  
of adenosine monophosphate to Sn(IV) for effective conversion of  
sucrose to 5-hydroxymethylfurfural**

Chenyu Wang, Lutong Jiao, Han Meng, Peijun Ji\*

College of Chemical Engineering, Beijing University of Chemical Technology,

Beijing 100029, PR China

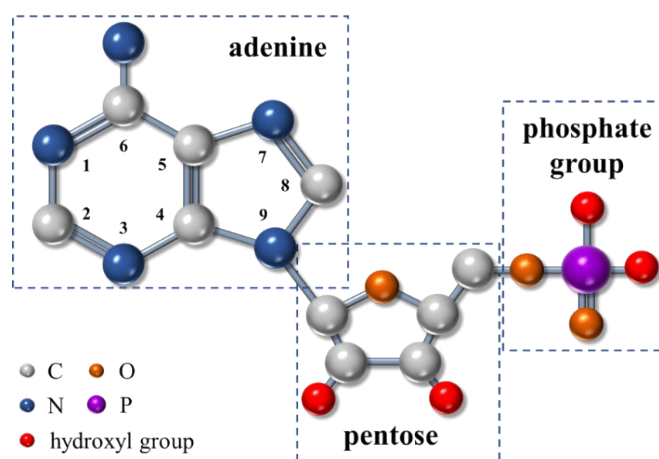

**Scheme S1.** Molecular structure of adenosine monophosphate.

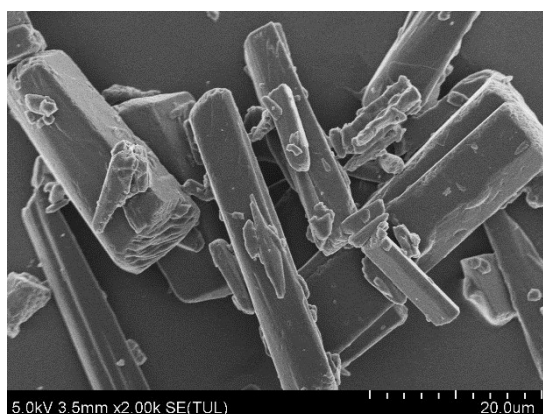

**Figure S1.** SEM image of AMP.

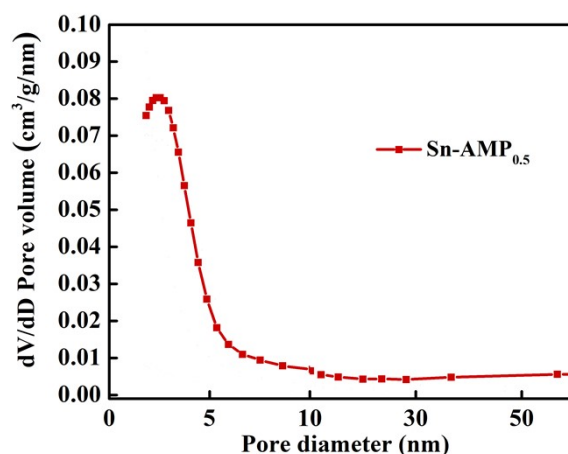

**Figure S2.** Pore size distribution of Sn-AMP<sub>0.5</sub>.

Figure S3 shows the Raman spectra for fresh Sn-AMP<sub>0.5</sub> and Sn-AMP<sub>0.5</sub> after interacting with glucose (Sn-AMP<sub>0.5</sub>+glucose) and with fructose (Sn-AMP<sub>0.5</sub>+fructose). The peaks at 1318 and 1424 cm<sup>-1</sup> are attributed to the adenine ring breathing mode.<sup>S1,S2</sup> The peaks at 1340 and 1404 cm<sup>-1</sup> are attributed to the sugar stretching mode.<sup>S1,S2</sup> The interactions of glucose and fructose with Sn-AMP<sub>0.5</sub> resulted in the intensity changes of these peaks. The peaks at 965 and 1015 cm<sup>-1</sup> of fresh Sn-AMP<sub>0.5</sub> are attributed to OH-P and N1-C6.<sup>S1,S2</sup> These peaks did not appear in the spectra of Sn-AMP<sub>0.5</sub>+glucose and Sn-AMP<sub>0.5</sub>+fructose, attributed the interactions of glucose and fructose with the phosphate and N1 of AMP. The Raman spectra can prove the hydrogen bonding interactions of glucose and fructose with Sn-AMP<sub>0.5</sub>.

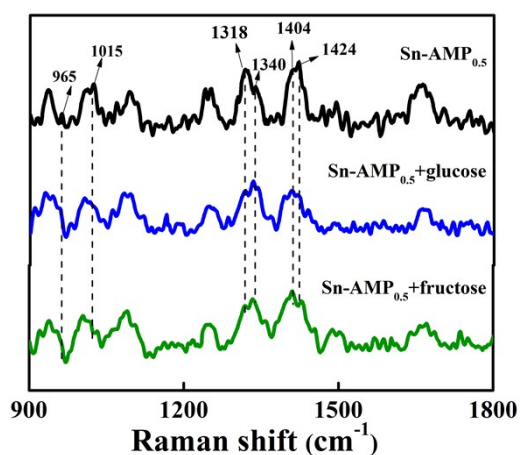

**Figure S3.** Raman spectra in the region of 900-1800 cm<sup>-1</sup> for fresh Sn-AMP<sub>0.5</sub> (black), Sn-AMP<sub>0.5</sub> after interacting with glucose (blue), and Sn-AMP<sub>0.5</sub> after interacting with fructose (oliver).

Raman spectra were recorded using a Raman microscope (Kaiser Optical Systems, Inc., Ann Arbor, MI, USA) with 785 nm laser excitation.

**Table S1.** FTIR spectra data of AMP and Sn-AMP<sub>0.5</sub>.

|                                 | AMP (cm <sup>-1</sup> ) | Sn-AMP (cm <sup>-1</sup> ) |
|---------------------------------|-------------------------|----------------------------|
| NH <sub>2</sub> - scissor mode  | 1695                    | 1695                       |
| NH <sub>2</sub> - bending mode  | 1650                    | 1650                       |
| C4-C5 skeletal vibrations       | 1595                    | —                          |
| pyrimidine ring vibration       | 1557                    | 1548                       |
| imidazole                       | 1504                    | 1514                       |
| N7-C8                           | 1463                    | 1463                       |
| C6-N1                           | 1421                    | 1421                       |
| pyrimidine                      | 1385                    | 1407                       |
| C6-NH <sub>2</sub> deformation  | 1280                    | —                          |
|                                 | 1198                    |                            |
| ribose C-O stretching vibration | 1102                    |                            |
|                                 | 1036                    |                            |
| P-O-H vibration                 | 1062,985                |                            |

**Table S2.** During the synthesis process for the Sn-AMP samples, the pH of the solutions after hydrothermal treatment.

|    | Sn-AMP <sub>0.125</sub> | Sn-AMP <sub>0.25</sub> | Sn-AMP <sub>0.5</sub> | Sn-AMP <sub>0.75</sub> |
|----|-------------------------|------------------------|-----------------------|------------------------|
| pH | 1.29                    | 1.34                   | 1.40                  | 1.56                   |

**Table S3.** Comparison of catalytic activity of Sn-AMP catalysts for dehydration of glucose.

| Entry | Catalyst                | X (%) | Y <sub>HMF</sub> (%) | Y <sub>fructose</sub> (%) | Y <sub>FA</sub> (%) |
|-------|-------------------------|-------|----------------------|---------------------------|---------------------|
| 1     | Sn-AMP <sub>0.125</sub> | 95.7  | 54.0                 | 4.2                       | 1.8                 |
| 2     | Sn-AMP <sub>0.25</sub>  | 96.8  | 62.1                 | 5.0                       | 2.1                 |
| 3     | Sn-AMP <sub>0.5</sub>   | 96.4  | 63.5                 | 4.1                       | 2.0                 |
| 4     | Sn-AMP <sub>0.75</sub>  | 97.1  | 56.4                 | 3.1                       | 2.2                 |

Reaction condition: glucose (200 mg), Sn-AMP (50 mg), 5 mL of solvent, water/THF (v:v 1:4), 160 °C, 5h.

**Table S4.** Comparison of Sn-AMP with other catalysts. (Yield: HMF yield, Sel.: HMF selectivity)

| saccharide | Solvent         | Catalyst                                     | T/°C | t/h | Yield | Sel.   | Ref.      |
|------------|-----------------|----------------------------------------------|------|-----|-------|--------|-----------|
| ucrose     | water/DMSO/HCL  | Sn-CP                                        | 170  | 4   | 61.6% | ≥64.8% | S3        |
| glucose    |                 |                                              | 170  | 4   | 63.9% | 65.4%  |           |
| sucrose    | water/THF/NaCl  | Sn-Mont                                      | 160  | 3   | 43.6% | -      | S4        |
| glucose    |                 |                                              |      |     | 41.7% | -      |           |
| sucrose    | water/Dioxane   | Sn-β/Amberlyst-131                           | 90   | 10  | 60.0% | -      | S5        |
| glucose    |                 |                                              |      | 16  | 56.0% | -      |           |
| sucrose    | water/THF/NaCl  | Phosphated TiO <sub>2</sub>                  | 175  | 2   | 43.0% | 45.3%  | S6        |
| glucose    |                 |                                              |      | 4   | 53.5% | 54.3%  |           |
| sucrose    | water /GVL/NaCl | APG-SO <sub>3</sub> H                        | 180  | 4   | 56.2% | -      | S7        |
| glucose    |                 |                                              |      |     | 52.9% | -      |           |
| sucrose    | water/THF       | [MimAM]nH3-nPW <sub>12</sub> O <sub>40</sub> | 160  | 7.5 | 23.5% | 24.9%  | S8        |
| glucose    |                 |                                              |      |     | 39.2% | 39.5%  |           |
| sucrose    | water/THF       | Sn-AMP <sub>0.5</sub>                        | 160  | 4.5 | 62.9% | 63.0%  | This work |
| glucose    | water/THF       |                                              | 160  | 5   | 67.5% | 69.6%  |           |

## References

- S1 J. Kundu, O. Neumann, B. G. Janesko, D. Zhang, S. Lal, A. Barhoumi, G. E. Scuseria and Halas, N. J. *J. Phys. Chem. C* 2009, **113**, 14390-14397.
- S2 B. Hernandez, R. Navarro, A. Hernanz and G. Vergoten, *Biopolymers* 2002, **67**, 440-55.
- S3 N. Jiang, W. Qi, Z. Wu, R. Su and Z. He, *Catal. Today*, 2018, **302**, 94-99.
- S4 J. Wang, J. Ren, X. Liu, J. Xi, Q. Xia, Y. Zu, G. Lu and Y. Wang, *Green Chem.*, 2012, **14**, 2506-2512.
- S5 Q. Guo, L. Ren, S. M. Alhassan and M. Tsapatsis, *Chem Commun (Camb)*, 2019, **55**, 14942-14945.
- S6 K. T. V. Rao, S. Souzanchi, Z. Yuan and C. Xu, *New J. Chem.*, 2019, **43**, 12483-12493.
- S7 S. Sun, L. Zhao, J. Yang, X. Wang, X. Qin, X. Qi and F. Shen, *ACS Sustain. Chem. Eng.*, 2020, **8**, 7059-7067.
- S8 P. Zhao, Y. Zhang, Y. Wang, H. Cui, F. Song, X. Sun and L. Zhang, *Green Chem.*, 2018, **20**, 1551-1559.
